# Supplementary material
Source: PubMed Central journal article supplement (PMC6583504)
Supplement: jama-319-2280-s002.pdf [file jama-319-2280-s002.pdf]

1  
2  
3  
4  
5  
6  
7  
8  
9  
10  
11  
12  
13  
14  
15  
16  
17  
18  
19  
20  
21  
22  
23  
24  
25  
26  
27  
28  
29  
30  
31  
32  
33  
34  
35  
36  
37  
38  
39

**UK WOLLF: UK Wound management of Open Lower Limb Fractures**

**A Randomised Controlled Trial of standard wound management versus negative pressure wound therapy in the treatment of adult patients with an open fracture of the lower limb**

**Statistical Analysis Plan version 2**

8<sup>th</sup> December 2015

**Ethical approval**

MREC approval was obtained on 6<sup>th</sup> February 2012 under reference number 12/WM/0001

**Funding**

Health Technology Assessment  
Ref number 10/57/20

**Sponsorship**

This study is jointly sponsored by the University of Warwick and University Hospitals Coventry and Warwickshire NHS Trust.

**Registration**

The study is registered with the current controlled trials database under reference number ISRCTN33756652

**Dates**

Study start date: March 2012  
Study end date: February 2017

|    |                                      |    |
|----|--------------------------------------|----|
| 40 | <b>Table of contents</b>             |    |
| 41 |                                      |    |
| 42 | Table of contents .....              | 2  |
| 43 | 1. Contact details .....             | 3  |
| 44 | 2. Background .....                  | 4  |
| 45 | 3. Trial design .....                | 5  |
| 46 | 3.1 Trial summary .....              | 5  |
| 47 | 3.2 Objectives.....                  | 6  |
| 48 | 3.3 Outcome measures .....           | 6  |
| 49 | 4. Data management and security..... | 7  |
| 50 | 5. Statistical analysis.....         | 7  |
| 51 | 5.1 Software .....                   | 8  |
| 52 | 5.2 Data validation .....            | 8  |
| 53 | 5.3 Missing data .....               | 8  |
| 54 | 5.4 Interim analyses .....           | 8  |
| 55 | 5.5 Final statistical analyses.....  | 8  |
| 56 | 5.6 Reporting .....                  | 10 |
| 57 |                                      |    |
| 58 |                                      |    |

59 **1. Contact details**

60

61 **Chief Investigator**

62 Professor Matthew Costa

63 Warwick CTU

64 Gibbet Hill Campus

65 Coventry

66 CV4 7AL

67 Matthew.Costa@warwick.ac.uk

68

69 **Trial Coordinator**

70 Sonia Davis

71 Warwick CTU

72 Gibbet Hill Campus

73 Coventry

74 CV4 7AL

75 02476 151386

76 S.D.Davis@warwick.ac.uk

77

78 **Senior Research Fellow**

79 Dr Juul Achten

80 Clinical Sciences Research Laboratories

81 Clifford Bridge Road

82 Coventry, CV2 2DX

83 02476968614

84 J.Achten@warwick.ac.uk

85

86 **Collaborating Centres – Feasibility phase**

87 (1) University Hospitals Coventry and Warwickshire NHS Trust, University Hospital

88 (2) University Hospitals Birmingham NHS Foundation Trust, Queen Elizabeth Hospital

89 (3) Oxford Radcliffe Hospitals NHS Trust, John Radcliffe Hospital

90 (4) North Bristol NHS Trust, Frenchay Hospital

91 (5) The Newcastle upon Tyne Hospitals NHS foundation Trust, Royal Victoria Hospital

92

93 **Additional collaborating centres – Main phase**

94 (6) Royal London Hospital (RLH)

95 (7) Poole Hospital (POH)

96 (8) Aintree University Hospital (AUH)

97 (9) Leeds General Infirmary (LGI)

98 (10) Addenbrookes Hospital, Cambridge (ADH)

99 (11) University Hospital Southampton (UHS)

100 (12) Northern General Hospital Sheffield (STH)

101 (13) Queen Alexandra Hospital (QAH)

102 (14) Royal Berkshire Hospital (RBH)

103 (15) Kings College Hospital (KCH)

104 (16) University Hospital of North Staffordshire (UNS)

105 (17) Plymouth Hospitals (PLY)

106 (18) Norfolk and Norwich University Hospital (NNH)

107 (19) Royal Derby Hospital (RDH)

108 (20) Hull Royal Infirmary (HRI)

109 (21) University Hospital Leicester (UHL)

110 (22) Nottingham University Hospital (NUH)

111 (23) Morriston Hospital Swansea (MHS)  
112 (24) Royal Sussex County Hospital, Brighton (RSC)

113  
114  
115

### 116 **Trial Management Group**

117 Professor Matthew Costa  
118 Professor Sallie Lamb  
119 Dr Juul Achten  
120 Dr Nick Parsons  
121 Sonia Davis  
122 Susie Hennings

123  
124

### 125 **Trial Steering Committee**

|                           |                                                     |
|---------------------------|-----------------------------------------------------|
| 126 Professor Amar Rangan | Consultant Orthopaedic Surgeon (Chair)              |
| 127 Mr Mike Read          | Consultant Orthopaedic Surgeon (Independent member) |
| 128 Mr Matthew Costa      | Chief Investigator                                  |
| 129 Sonia Davis           | Trial co-ordinator                                  |
| 130 Dr Nick Parsons       | Trial Statistician                                  |
| 131 Prof Stavros Petrou   | Trial health economist                              |
| 132 Mrs Ceri Jones        | Sponsor representative (manager R&D UHCW)           |
| 133 Mrs Carole Beamish    | Lay Member                                          |

134

### 135 **Data monitoring committee**

|                             |                                         |
|-----------------------------|-----------------------------------------|
| 136 Professor Lee Shepstone | Professor of Medical Statistics (Chair) |
| 137 Prof Simon Donell       | Consultant Orthopaedic Surgeon          |
| 138 Mr Phillip Johnston     | Consultant Orthopaedic Surgeon          |

139  
140

## 141 **2. Background**

142

143 A full summary of the background to the trial can be found in the WOLLF protocol.  
144 Fractures of the lower limb are extremely common injuries in both the civilian and  
145 military populations. Fortunately, the majority of these injuries are 'closed' i.e. the skin  
146 around the fracture is intact. In such cases, the risk of infection is low. However, if the  
147 fracture is 'open' such that the barrier provided by the skin is breached, then the  
148 broken bone is exposed to contamination from the environment. *Traditionally a non-*  
149 *adhesive dressing/sterile gauze is applied to the exposed area. This is then wrapped*  
150 *up in a bandage to protect the open fracture from further contamination. The*  
151 *wound is covered in this way until a second look and further debridement is*  
152 *performed in the operating theatre, usually 48 hours after the initial injury. This*  
153 *method has been used throughout the NHS and in military practice for many years.*  
154 *However, any bleeding or ooze from the open fracture will soak into the dressings;*  
155 *this may be uncomfortable for the patient and, if the blood soaks through the*  
156 *dressings, may pose an infection risk. Negative-pressure wound therapy (NPWT) is an*  
157 *alternative form of dressing which may be applied to open fractures. In this*  
158 *treatment, an 'open-cell', solid foam is laid onto the wound followed by an*  
159 *adherent, waterproof dressing. A hole is made in the dressing overlying the foam*  
160 *and a sealed tube is used to connect the foam to a pump which creates a partial*  
161 *vacuum over the wound. This negative-pressure therapy removes blood and ooze*  
162 *from the area of the wound, may also remove any bacteria left in the wound and*

163 encourages the formation of 'granulation' (healing) tissue. NPWT is considerably  
164 more expensive than traditional wound dressings, both for the dressing itself and the  
165 associated machinery which generates the partial vacuum. There is a pressing need  
166 to evaluate this relatively expensive technology. Therefore a multi-centre  
167 randomised clinical trial is proposed to compare **negative-pressure wound therapy**  
168 with **standard dressings** for patients with wounds associated with open fractures of  
169 the lower limb.

170  
171

### 172 **3. Trial design**

173  
174

#### 175 **3.1 Trial summary**

176 The proposed project is a two-phased study. Phase 1 (Feasibility phase) will assess the  
177 feasibility of running a large-scale multi-centre randomised controlled trial in this  
178 complicated area of trauma research. Phase 2 (Main phase) will undertake the  
179 proposed randomised controlled trial in a minimum of 18 trauma centres across the  
180 UK.

181

##### 182 *Feasibility*

183 The feasibility phase will take place in 5 centres over a period of 6 months. The trial  
184 will run as described below for the main trial, with the addition of a qualitative sub-  
185 study assessing patients' experience of giving consent for the trial and the  
186 acceptability of the trial procedures to patients and staff. Screening logs will be kept  
187 at each site to determine the number of patients assessed for eligibility and reasons  
188 for any exclusion. In addition, the number of eligible and recruited patients will be  
189 recorded.

190

##### 191 *Main RCT*

192 All adult patients presenting at the trial centres within 72 hours of sustaining an open  
193 fracture of the lower limb are potentially eligible to take part in the trial. Inclusion  
194 within the trial depends on the severity the wound associated with the fracture.  
195 Gustilo and Anderson Grade 2 and 3 injuries will be included. A randomisation  
196 sequence, stratified by trial centre and Gustilo and Anderson grade, will be  
197 produced and administered by a secure web-based service. The random allocation  
198 will be to either standard wound management or negative pressure wound therapy.

199

200 The patients will have clinical follow-up in the local fracture clinic up to a minimum of  
201 12 months as per standard NHS practice after this injury. Functional and quality of life  
202 outcome data will be collected using the DRI, SF12 and EQ-5D questionnaires at 3  
203 months, 6 months, 9 months and 12 months post-operatively. These postal  
204 questionnaires will be administered centrally by a data administrator. In addition, at  
205 the same time-points, information will be requested with regards to resource use and  
206 any late complications or interventions related to their injury with specific note of  
207 ongoing treatment for deep infection.

208

209 The full trial details, including eligibility, inclusions and exclusion criteria, withdrawal  
210 protocols, blinding, randomisation, sample size calculations and methods for the  
211 management of adverse events are fully described in the WOLFF protocol. With an  
212 allowance for a conservative 10% loss to follow-up, the trial plans to recruit **460**  
213 **patients** in total.

214

215  
216  
217  
218  
219  
220  
221  
222  
223  
224  
225  
226  
227  
228  
229  
230  
231  
232  
233  
234  
235  
236  
237  
238  
239  
240  
241  
242  
243  
244  
245  
246  
247  
248  
249  
250  
251  
252  
253  
254  
255  
256  
257  
258  
259  
260  
261  
262  
263  
264  
265  
266

### 3.2 Objectives

This pragmatic randomised controlled trial will compare standard dressings with negative-pressure wound therapy in the treatment of wounds associated with open fractures of the lower limb.

#### *Feasibility*

The specific objectives for the feasibility phase of this study are:

- (1) A qualitative assessment of patients' experience of giving consent for the trial and the acceptability of the trial procedures to patients and staff
- (2) To determine the number of eligible, recruited and withdrawn patients in the 5 feasibility trauma centres over the course of 6 months

At the end of the feasibility phase, the Trial Management Group will provide a report to the Trial Steering Committee. The report will show the actual rate of recruitment at the five centres involved in the feasibility phase compared with the target rate of recruitment (one patient per month per centre), in the context of the results of the qualitative study. If the patients are willing to give their consent and the rate of recruitment achieves the target rate by the end of the feasibility phase, we would anticipate proceeding to the main trial.

#### *Main RCT*

The primary objective for the full RCT is:

- (1) To quantify and draw inferences on observed differences in the Disability Rating Index at 12 months after the open fracture.

The secondary objectives are:

- (2) To quantify and draw inferences on patient-reported differences in the rate of wound healing and deep infection of the limb, in the 12 months after the open fracture. Photographs will be used to assess wound healing. Any infection that requires ongoing medical intervention or has already led to amputation at or after the six week review will be considered a 'deep' infection.
- (3) To quantify and draw inferences on observed differences in general quality of life (SF-12 and EQ-5D) of patients with an open fracture of the lower limb in the 12 months after the injury.
- (4) To determine the rate of complications and any further medical intervention related to these, of negative pressure wound therapy versus standard dressing during the first 12 months after the open fracture.
- (5) To investigate, using appropriate statistical and economic analysis methods, the resource use, and thereby the cost effectiveness, of negative pressure wound therapy versus standard dressing for wounds associated with open fractures of the lower limb.

### 3.3 Outcome measures

Primary outcome measure:

The primary outcome measure for this study is the **Disability Rating Index (DRI)** a self-administered, 12-item Visual Analogue Scale questionnaire assessing the patients' own rating of their disability. This measure was chosen as it addresses "gross body movements" rather than specific joints or body segments. Therefore, it will facilitate the assessment of patients with different fractures of the lower limb.

267 The secondary outcome measures in this trial are:  
268 (1) Deep Infection; Patients will be asked to self-report any medical intervention  
269 related to infection associated with their open fracture at each of the follow-up  
270 points. Any infection that requires ongoing medical intervention or has already  
271 led to amputation at or after the routine six week outpatient appointment will  
272 therefore be considered a deep infection. In addition, we will use photographs  
273 of the wound at each clinical follow-up until the wound is healed in order to  
274 provide an objective assessment of wound healing and infection up to 12  
275 months after the injury. The photographs will be reviewed by two experienced  
276 investigators who are blind to the treatment allocation.  
277 (2) EuroQol EQ-5D; The EuroQol EQ-5D is a validated measure of health-related  
278 quality of life, consisting of a five dimension health status classification system  
279 and a separate visual analogue scale.  
280 (3) SF-12; The Short-Form 12 is a validated and widely-used health-related quality  
281 of life measure. Each permutation of response to the SF-12 will be converted into  
282 a MAU score using a published utility algorithm. These data will be combined  
283 with survival data to generate QALY profiles for the purposes of the economic  
284 evaluation.  
285 (4) Complications; All complications and subsequent medical interventions  
286 related to the trial interventions will be recorded.  
287 (5) Resource use; This will be monitored for the economic analysis. Unit cost data  
288 will be obtained from national databases such as the BNF and PSSRU Costs of  
289 Health and Social Care. The cost consequences following discharge, including  
290 NHS costs and patients' out-of-pocket expenses will be recorded via a short  
291 questionnaire which will be administered at 3, 6, 9 and 12 months post surgery.  
292 Patient self-reported information on service use has been shown to be accurate  
293 in terms of the intensity of use of different services.  
294  
295

#### 296 **4. Data management and security**

297 The Case Report Forms (CRFs) will be designed by the trial coordinator in conjunction  
298 with the trial management team. All electronic patient-identifiable information will  
299 be held on a secure, password-protected database accessible only to essential  
300 personnel. Paper forms with patient-identifiable information will be held in secure,  
301 locked filing cabinets within a restricted area of Warwick Medical School. Patients will  
302 be identified by a code number only. Direct access to source data/documents will  
303 be required for trial-related monitoring. All paper and electronic data will be  
304 retained for at least five years after completion of the trial.  
305

306 Full details of management and checking of CRFs, x-rays, participant postal  
307 questionnaires and SAE forms are given in the WOLLF Data Management Plan. For  
308 newly employed data administrators entering data the trial coordinator will perform  
309 a 100% data check of a minimum of 30 CRFs and questionnaires entered or until the  
310 error rate is less than 1%. A routine 10% check will be performed every month; the  
311 sample will be generated from the forms entered that month. If an error rate of over  
312 1% is found, then an additional sample will be taken. If a further 1% error rate is found,  
313 then a 100% check will be performed of the particular forms concerned.  
314

#### 315 **5. Statistical analysis**

316  
317  
318

319 **5.1 Software**

320 When any analyses are required, data will be retrieved from the trial database by  
321 the trial statistician. The statistician will import data directly into the statistical  
322 package R for analysis and reporting (<http://www.r-project.org/>) using an ODBC  
323 (Open DataBase Connectivity) link; the version numbers of all software used, data  
324 files and all R scripts will be made available to the Data Monitoring Committee (DMC)  
325 on request at any stage of the trial. Statistical results will be reported in accordance  
326 with CONSORT guidelines (<http://www.consort-statement.org/>).  
327

328  
329 **5.2 Data validation**

330 Prior to formal analysis, data will be checked for outliers, missing values and  
331 validated using the defined score ranges for all outcome measures. Queries will be  
332 reported to the trial coordinator and investigated. Standard statistical summaries  
333 (e.g. medians and ranges or means and variances, dependent on the distribution of  
334 the outcome) and graphical plots showing correlations will be presented for the  
335 primary outcome measure and all secondary outcome measures. Baseline data will  
336 be summarized to check comparability between treatment arms, and to highlight  
337 any characteristic differences between those individuals in the study, those ineligible,  
338 and those eligible but withholding consent.  
339

340  
341 **5.3 Missing data**

342 It seems likely that some data may not be available due to voluntary withdrawal of  
343 patients, lack of completion of individual data items or general loss to follow-up.  
344 Where possible the reasons for data 'missingness' will be ascertained and reported.  
345 Although missing data are not expected to be a problem for this study, the nature  
346 and pattern of the missingness will be carefully considered — including in particular  
347 whether data can be treated as missing completely at random (MCAR). If judged  
348 appropriate, missing data will be imputed using the multiple imputation facilities  
349 (mice package) available in R (<http://www.r-project.org/>). Any imputation methods  
350 used for scores and other derived variables will be carefully considered and justified.  
351 If the degree of missingness is relatively low, as expected, the primary analysis will be  
352 based on complete cases only (*complete case analysis*), with analysis of imputed  
353 datasets used to assess the sensitivity of the analysis to the missing data. Reasons for  
354 ineligibility, non-compliance, withdrawal or other protocol violations will be stated  
355 and any patterns summarized. More formal analysis, for example using logistic  
356 regression with 'protocol violation' as a response, may also be appropriate and aid  
357 interpretation.  
358

359  
360 **5.4 Interim analyses**

361 Interim analyses will be performed only where directed by the DMC. Interim analyses  
362 will follow the same procedure as the final analyses.  
363

364  
365 **5.5 Final statistical analyses**

366  
367 **5.5.1 Feasibility Study**

368 At the end of the feasibility phase, the overall mean recruitment rates at the five  
369 selected centres for this phase of the study will be estimated (with a 95% confidence  
370 interval based on a normal approximation) and compared to the target rate of one



371 patient per month per centre. The estimated recruitment rate in the feasibility phase  
372 will inform both the design and the decision to proceed to the main RCT. Additionally  
373 the nature and pattern of trial withdrawals and the likely impact of this on the main  
374 RCT will also be carefully considered.

375

### 376 **5.5.2 Main RCT**

377

#### 378 *Primary Outcome*

379 The null hypothesis for WOLLF is that, *there is no difference in the Disability Rating*  
380 *Index score (DRI) one year post-injury between adult patients with an open fracture*  
381 *to the lower limb treated with standard wound dressings versus negative pressure*  
382 *wound therapy.*

383

384 The main analysis will investigate differences in the primary outcome measure, the  
385 Disability Rating Index (DRI) score at one year after injury, between the two  
386 treatment groups (standard wound dressings and negative pressure wound therapy)  
387 on an intention-to-treat basis. In addition, early functional status will also be assessed  
388 and reported at 3, 6 and 9 months. Differences between groups will be assessed,  
389 based on a normal approximation for the DRI score at 12 months post-injury, and at  
390 interim occasions. Tests will be two-sided and considered to provide evidence for a  
391 significant difference if p-values are less than 0.05 (5% significance level).

392

393 The stratified randomisation procedure should ensure a balance in Gustilo and  
394 Anderson grade and the recruiting centre between test treatments. Although  
395 generally we have no reason to expect that clustering effects will be important for  
396 this study, in reality the data will be hierarchical in nature, with patients naturally  
397 clustered into groups by recruiting centre. Therefore we will account for this by  
398 generalizing the conventional linear (fixed-effects) regression approach to a mixed-  
399 effects modelling approach; where patients are naturally grouped by recruiting  
400 centres (random-effects). This model will formally incorporate terms that allow for  
401 possible heterogeneity in responses for patients due to the recruiting centre, in  
402 addition to the fixed effects of the treatment groups, Gustilo and Anderson grade  
403 and other patient characteristics that may prove to be important moderators of the  
404 treatment effect such as age and gender.

405

406 The main analyses will be conducted using specialist mixed-effects modelling  
407 functions available in the software package R (<http://www.r-project.org/>) where DRI  
408 data will be assumed to be normally distributed; possibly after appropriate variance-  
409 stabilising transformation. The primary focus will be the comparison of the two  
410 treatment groups of patients, and this will be reflected in the analysis which will be  
411 reported together with appropriate diagnostic plots that check the underlying  
412 model assumptions. Results will be presented as mean differences between the trial  
413 groups, with 95% confidence intervals.

414

#### 415 *Secondary Outcomes and Complications*

416 Secondary analyses will be undertaken using the above strategy for approximately  
417 normally distributed outcome measures SF-12 and EQ5D. For dichotomous outcome  
418 variables, such as indicators of deep infection and other complications related to  
419 the trial interventions, mixed effects logistic regression analysis will be undertaken with  
420 results presented as odds ratios (and 95% confidence intervals) between the trial  
421 groups. The temporal patterns of any complications will be presented graphically  
422 and if appropriate a time-to-event analysis (Kaplan-Meier survival analysis) will be

423 used to assess the overall risk and risk within individual classes of complications (e.g.  
424 infection). About 1-2% of patients are expected to die during follow-up, so this is  
425 unlikely to be a serious cause of bias. However, we will also if appropriate conduct a  
426 secondary analysis taking account of the competing risk of death, based on  
427 cumulative incidence functions. If multiple complications prove to be widely  
428 reported, then a secondary analysis will use a Poisson regression model (or zero-  
429 inflated Poisson regression model) to assess overall differences in counts of events  
430 between groups, adjusting for potential confounding factors such as age and  
431 gender. Multiple complications are defined as two or more independent events, i.e.  
432 not continuations of a previous complication, for the same patient and will be  
433 identified only after discussion with the clinical team.

434

### 435 **5.5.3 Analysis plan**

436 The statistical analysis plan (SAP) will be agreed with the Data management  
437 Committee (DMC) at the start of the study. Any subsequent amendments to this  
438 initial SAP will be clearly stated and justified. Interim analyses will be performed only  
439 where directed by the DMC. The routine statistical analysis will mainly be carried out  
440 using R (<http://www.r-project.org/>) and S-PLUS (<http://www.insightful.com/>).

441

### 442 **5.6 Reporting**

443 Wherever possible, the results of all analyses will be presented in a simple and easy to  
444 follow manner and relate any observed differences to their clinical importance, such  
445 that they could be clearly understood by those with only rudimentary statistical  
446 knowledge. Open and confidential reports of the statistical analyses will be  
447 produced, as required, by the trial statistician and where appropriate results will be  
448 disseminated through peer-reviewed journals, conference presentations and through  
449 local mechanisms.

450

451
